# Supplementary material for: Barriers, Enablers and Strategies for the Treatment and Control of Hypertension in Nepal: A Systematic Review
Source: Front Cardiovasc Med. 2021 Oct 11;8:716080. doi: 10.3389/fcvm.2021.716080 (PMC8542767; doi:10.3389/fcvm.2021.716080)
Supplement: Supplementary file 4 [file Table_4.xlsx]

## Sheet: Quality assessment
Table 4. Qualitative assessment of the studies using MMAT 2018
Category	Study ID	Items
Qualitative study checklist		1.1	1.2	1.3	1.4	1.5	Overall stars
	Devkota et al. (2016)	*	*	*	*	*	*****
	Khanal et al. (2017)	#	#	*	#	*	**
A	Oli et al. (2014)	*	*	*	*	*	*****
	Shrestha et al. (2018)	*	*	#	*	*	****
Randomized controlled trials checklist		2.1	2.2	2.3	2.4	2.5
	Neupane et al. (2018)	*	*	#	*	*	****
B	Khadka et al. (2010)	##	*	*	#	*	***
Nonrandomized studies checklists		3.1	3.2	3.3	3.4	3.5
	Bhandari et al. (2015)	*	*	*	*	##	****
A	Devkota et al. (2016)	*	*	*	#	##	***
	Dhimal et al. (2020)	*	*	*	#	##	***
	Khan et al. (2013)	#	*	*	#	##	**
	Maharjan S (2016)	#	*	*	#	##	**
	Roka et al. (2020)	#	*	*	*	##	***
	Simkhada R (2012)	#	*	*	#	##	**
	Humagain et al. (2015)	#	*	*	#	*	***
B	Kumar et al. (2019)	*	*	#	#	*	***
	Sharma et al. (2014)	#	*	*	#	*	***
Mixed method study check list		5.1	5.2	5.3	5.4	5.5
A	Devkota et al. (2016)	#	*	*	#	*	***
	A, studies assessed facilitators and barriers; B, studies investigated strategies for hypertension treatment and control
	Responses: *, Yes; #, No; ##, Can't tell
	Items for qualitative study checklist
	1.1. Is the qualitative approach appropriate to answer the research question?
	1.2. Are the qualitative data collection methods adequate to address the research question?
	1.3. Are the findings adequately derived from the data?
	1.4. Is the interpretation of results sufficiently substantiated by data?
	1.5. Is there coherence between qualitative data sources, collection, analysis and interpretation?
	Items for quantitative randomized controlled trials
	2.1. Is randomization appropriately performed?
	2.2. Are the groups comparable at baseline?
	2.3. Are there complete outcome data?
	2.4. Are outcome assessors blinded to the intervention provided?
	2.5 Did the participants adhere to the assigned intervention?
	Items for quantitative nonrandomized studies
	3.1. Are the participants representative of the target population?
	3.2. Are measurements appropriate regarding both the outcome and intervention (or exposure)?
	3.3. Are there complete outcome data?
	3.4. Are the confounders accounted for in the design and analysis?
	3.5. During the study period, is the intervention administered (or exposure occurred) as intended?
	Items for mixed method study
	5.1. Is there an adequate rationale for using a mixed methods design to address the research question?
	5.2. Are the different components of the study effectively integrated to answer the research question?
	5.3. Are the outputs of the integration of qualitative and quantitative components adequately interpreted?
	5.4. Are divergences and inconsistencies between quantitative and qualitative results adequately addressed?
	5.5. Do the different components of the study adhere to the quality criteria of each tradition of the methods involved?
